# Supplementary material
Source: Springer Nature journal article supplement (https://www.springermedizin.de/resource/supplementary/12913_2009_1313_MOESM1_ESM.pdf/9527838)

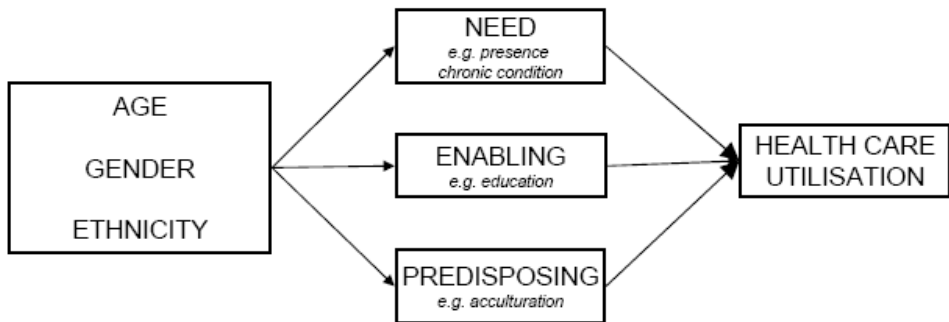

*specific determinants  
cf. Andersen's model*

Supplement: MOESM1 [file 9527838]
